# Supplementary material
Source: publisher figshare collection journal article supplement (https://gsapubs.figshare.com/ndownloader/files/22409343)
Supplement: Supplementary file 1 [file 22409343]

Cyr, A.J., Miller, D.M., and Mahan, S. A., 2015, Paleodischarge of the Mojave River, southwestern United States, investigated with single-pebble measurements of 10Be: Geosphere, v. 11, doi:10.1130/GES01134.1.

http://dx.doi.org/10.1130/GES01134.S3

| TABLE DR2. CRONUS EARTH CALCULATOR* INPUT PARAMETERS | | | | | | | | | | | | | | |
| --- | --- | --- | --- | --- | --- | --- | --- | --- | --- | --- | --- | --- | --- | --- |
| Sample name | Latitude† | Longitude† | Elevation§ | Elevation/pressure flag | Sample thickness | Sample density | Shielding correction | Erosion rate | [10Be] | [10Be]# unc. | 10Be stnd. | [26Al] | [26Al] unc. | 26Al stnd. |
|  | (DD N) | (DD W) | (m) |  | (cm) | (g/cm3) |  | (cm/y) | (x104 at/g) | (x104 at/g) |  |  |  |  |
| MRT-2a | 34.951847 | 116.55882 | 841 | std | 2 | 2.65 | 1 | 0 | 229.93 | 16.36 | 07KNSTD | N.M.** | N.M. | -- |
| MRT-2b | 34.951847 | 116.55882 | 841 | std | 2 | 2.65 | 1 | 0 | 1781.18 | 96.30 | 07KNSTD | N.M. | N.M. | -- |
| MRT-2d | 34.951847 | 116.55882 | 841 | std | 2 | 2.65 | 1 | 0 | 785.84 | 44.75 | 07KNSTD | N.M. | N.M. | -- |
| MRT-2e | 34.951847 | 116.55882 | 841 | std | 2 | 2.65 | 1 | 0 | 858.70 | 45.41 | 07KNSTD | N.M. | N.M. | -- |
| MRT-2f | 34.951847 | 116.55882 | 841 | std | 2 | 2.65 | 1 | 0 | 162.33 | 8.70 | 07KNSTD | N.M. | N.M. | -- |
| MRT-2h | 34.951847 | 116.55882 | 841 | std | 2 | 2.65 | 1 | 0 | 762.09 | 44.40 | 07KNSTD | N.M. | N.M. | -- |
| MRT-2i | 34.951847 | 116.55882 | 841 | std | 2 | 2.65 | 1 | 0 | 640.72 | 36.21 | 07KNSTD | N.M. | N.M. | -- |
| MRT-2j | 34.951847 | 116.55882 | 841 | std | 2 | 2.65 | 1 | 0 | 413.57 | 22.17 | 07KNSTD | N.M. | N.M. | -- |
| MRT-2k | 34.951847 | 116.55882 | 841 | std | 2 | 2.65 | 1 | 0 | 190.57 | 10.18 | 07KNSTD | N.M. | N.M. | -- |
| MRT-2n | 34.951847 | 116.55882 | 841 | std | 2 | 2.65 | 1 | 0 | 453.30 | 23.77 | 07KNSTD | N.M. | N.M. | -- |
| *Wrapper script v2.2; Main calculator v2.1; Constants v2.2.1; Muons v1.1 using the default calibration data set. Calculated on 12/18/2013 | | | | | | | | | | | | | | |
| †NAD83 | | | | | | | | | | | | | | |
| §Catchment-average elevation of the modern Mojave River basin. | | | | | | | | | | | | | | |
| #1-sigma AMS uncertainty | | | | | | | | | | | | | | |
| **N.M. = not measured | | | | | | | | | | | | | | |
